# Supplementary material
Source: publisher site journal article supplement (https://www.dovepress.com/get_supplementary_file.php?f=301670.docx)
Supplement: Supplementary file 1 [file get_supplementary_file.php]

**Table S1 Back-translation,issues and agreements for each Patient’s Communication Perceived Self-efficacy Scale (PCSS) item**

| **Original** | **Back-translation (BT1)** | **Back-translation (BT2)** | **Issues** | **Agreement(Translation)** |
| --- | --- | --- | --- | --- |
| Patient’s Communication Perceived Self-efficacy Scale | Patient’s Communication Self-efficacy Scale | Patient’s Communication Perceived Self-efficacy Scale | Uncertainly whether the word “Perceived” should be used in the Chinese version. | “患者交流自我效能感量表”  (Patient’s Communication Self-efficacy Scale)  The most appropriate Chinese phrase was chosen. |
| I can ask my doctor further information about my disease even in the phrase of other health workers (doctors or nurses) | Even in the presence of other health workers (doctors or nurses), I can ask ask more about my disease from my doctor | Even in the presence of other medical workers, I can ask my doctor further information about my physical condition | Uncertainly the phrase “doctors or nurses” should be added in the Chinese version. | “即使有其他医务人员在场，我也会向我的医生进一步询问自身病情”  (Even in the phrase of other health workers, I can ask my doctor further information about my disease)  The Chinese version is correct in terms of style. |
| I can ask my doctor for an explanation of the course of my disease even if I’m in a state of anxiety | I can ask my doctor to explain my course even if I’m in a state of anxiety | I can ask my doctor to explain the course of my disease even if I’m in a state of anxiety | Discussion the reasonable expression in the Chinese version. | “即使我处于焦虑状态，我也可以请医生解释我的病程”  (Even if I’m in a state of anxiety, I can ask my doctor for an explanation of the course of my disease)  The most correct Chinese version has been chosen. |
| I can tell my doctor honestly my omissions in following the course of treatment | I can tell my doctor honestly missing information in following the course of treatment | I can tell my doctor honestly missing symptoms in following the course of treatment | Uncertainly how to translate into Chinese “my omissions” | “我可以诚实地告诉我的医生，在治疗过程中自已以往忽视的症状”  (I can tell my doctor honestly my omissions in following the course of treatment)  The most reasonable Chinese version has been chosen. |
| I can ask my doctor to explain a new and complicated therapy in a simple way | I can ask my doctor to explain the complicated treatment in a simple way | I can ask my doctor to explain my complicated therapy in a simple way | Discussion on whether the phrase “a new ”should be added in the Chinese version | “我可以请医生用简单的方式解释复杂的治疗方法”  (I can ask my doctor to explain the complicated therapy in a simple way)  The phrase “a new” has been deleted in the Chinese version. |
| I can tell my doctor I’m not capable of handing my disease | I can tell my doctor that my condition is not well controlled | I can tell my doctor that I cannot control my condition | Uncertaionly how to translate into Chinese “handing my disease” | “我可以告诉我的医生，我的病情目前没有得到控制”  (I can tell my doctor that my disease has not been controlled)  The Chinese version meets Chinese language requirements. |
| I can express my doubts about the treatment even if the doctor is hurrying me | I can express my doubts about the treatment even if the doctor is hurrying me | I can express my wonders about the treatment even if the doctor is urging | Uncertainly whether the word “doubts” and “urging” should be translated in the Chinese version | “即使医生催促，我也阐述自己的疑惑”  (Even if the doctor is urging, I can express my doubts)  The most adequate Chinese translation was chosen. |
| I can repeat in my own words to the doctor the information he/she just gave to me | I can repeat the information that the doctor just gave to me by my own words | I can paraphrase in my own words to the doctor the information he just gave to me | Discussion on whether to choose a more reasonable way of introducing this item | “我可以用自己的语言将医生提供给我的信息进行转述”  (I can use my own words to repeat the information provided to me by the doctor)  The most appropriate Chinese version was chosen. |
| I can keep my mind on medician’s words, even if I had a dispute with a member of my family | I can obey the medician’s words, even if I had a dispute with a member of my family | I can obey the medician’s words, even if I had objections with my family | Discussion on a more simple way of introducing this item | “我可以遵守医生的指示，即使与我的家人存在异议”  (I can obey the medician’s words, even if I had a dispute with a member of my family)  A more simple way of introducing this item has been chosen. |
| I can listen to the information about my treatment even if I already know it because it is the same therapy of a friend of mine | Even if I already know my treatment, I can listen to this information, because it is the same as a friend's treatment | Even if I already know the same treatment from my friend, I can listen to this information again | More simple version of item in Chinese version should be given. | “即使我已经从我朋友那里知道同样的治疗方法，我也可以再次听听这些信息”  (Even if I already know the same treatment from my friends, I can listen to it again)  Chinese version is correct in terms of style. |
| I can hold my doctor’s gaze while I ‘m telling him/her I didn’t following my therapy | I can look at the doctor while I ‘m telling him/her I didn’t following my therapy | I let my eyes on doctor while I ‘m telling him/her I didn’t following my therapy | Uncertainly how to translate into Chinese “I can hold my doctor’s gaze” | “当我告诉医生，我没有接受治疗时，我可以注视他/她的目光”  (I can hold my doctor’s gaze while I ‘m telling him/her I didn’t following my therapy)  Chinese version is correct in terms of grammer. |
| I can tell my doctor what I like/dislike about my treatment | I can tell my doctor whether I like my treatment | I can tell my doctor whether I accept my treatment | Uncertainly how to translate into Chinese “like/dislike” | “我可以告诉我的医生我是否接受我的治疗方式”  (I can tell my doctor whether I accept my treatment)  The word “accept” has been used in the Chinese version. |
| I can tell the doctor what kind of treatment I prefer (eg.pills,syringes) even if he/she is most unwelcoming | I can tell the doctor what kind of treatment I prefer (eg.pills,syringes) even if he/she is unacceptable | I can tell the doctor what kind of treatment I prefer (eg.pills,syringes) even if he/she didn’t like that | Discussion on how to translate into Chinese “most unwelcoming” | “我可以告诉医生我喜欢什么样的治疗(药片，注射器）即使他/她不喜欢那样”  (I can tell the doctor what kind of treatment I prefer (eg. pills, syringes) even if he/she didn’t like that)  The most correct Chinese expression has been chosen. |
| I can ask doctor’s advice about my lifestyle even if he/she is on the point of ending our meeting | I can ask doctor’s advice about my lifestyle even if we are ending the conversation | I can ask doctor’s advice about my lifestyle even if we are on the point of ending our meeting | Uncertainly whether the phrase “on the point of ending our meeting” should be translate in the Chinese version | “我可以向医生咨询我的生活方式，即使我们即将结束谈话”  (I can ask doctor’s advice about my lifestyle even if we are on the point of ending our meeting)  The most adequate Chinese term was chosen. |
| I can express my disagreement to the doctor who behaves arrogantly | I can express my disagreement to the doctor | I can express my disagreement to the doctor | Uncertainly whether the phrase “who behaves arrogantly” should be translated in the Chinese version | “我可以向医生表达我的异议”  (I can express my disagreement to the doctor )  “Who behaves arrogantly” has been deleted in the Chinese version. |
| I can claim doctor’s attention if he/she looks distracted | I can claim doctor’s attention if he/she looks bad | I can claim doctor’s attention if he/she looks distracted | Chinese language has multiple meanings for the word “distracted” | “如果他/她看起来心情不佳，我可以提醒医生注意”  (I can claim doctor’s attention if he/she looks distracted)  “Distracted” is the most reasonable translation. |
| I can express my perplexity when my doctor speaks to me about the course of my disease with long words | I can express my perplexity when my doctor briefly described my condition | I can express my perplexity when my doctor simply described my condition | Uncertainly how to translate into Chinese “with long words” | “当我的医生简单地描述我的病情时，我可以表达我的困惑”  (I can express my perplexity when my doctor briefly described my condition)  The Chinese version is most correct in terms of style. |
